# Supplementary material for: Structural Diversity of Sense and Antisense RNA Hexanucleotide Repeats Associated with ALS and FTLD
Source: PubMed Central journal article supplement (PMC7037139; doi:10.3390/molecules25030525), 2020-01-25
Supplement: molecules-25-00525-s001.pdf [file molecules-25-00525-s001.pdf]

*Supplementary Materials*

# **Structural diversity of sense and antisense RNA hexanucleotide repeats associated with ALS and FTLD**

**Tim Božič**<sup>1</sup>, **Matja Zalar**<sup>1</sup>, **Boris Rogelj**<sup>2,3</sup>, **Janez Plavec**<sup>1,4,5,\*</sup> and **Primož Šket**<sup>1,\*</sup>

<sup>1</sup> Slovenian NMR Centre, National Institute of Chemistry, Hajdrihova 19, SI-1000 Ljubljana, Slovenia.

<sup>2</sup> Department of Biotechnology, Jožef Stefan Institute, Jamova 39, SI-1000 Ljubljana, Slovenia.

<sup>3</sup> Biomedical Research Institute BRIS, Puhova 10, SI-1000 Ljubljana, Slovenia.

<sup>4</sup> EN-FIST Center of Excellence, Trg OF 13, SI-1000 Ljubljana, Slovenia.

<sup>5</sup> Faculty of Chemistry and Chemical Technology, University of Ljubljana, Večna pot 113, SI-1000 Ljubljana, Slovenia.

\* Correspondence and requests for materials should be addressed to P. Šket (email: [primoz.sket@ki.si](mailto:primoz.sket@ki.si)) and J. Plavec (email: [janez.plavec@ki.si](mailto:janez.plavec@ki.si))

## Table of contents

|                    |                                                                                                                                                                                                                                            |     |
|--------------------|--------------------------------------------------------------------------------------------------------------------------------------------------------------------------------------------------------------------------------------------|-----|
| <b>Figure S1.</b>  | Canonical and non-canonical base pairs.                                                                                                                                                                                                    | S2  |
| <b>Figure S2.</b>  | Cytosine H5/H6 correlation region of 2D TOCSY NMR spectrum of r(G <sub>2</sub> C <sub>4</sub> ) <sub>4</sub> .                                                                                                                             | S3  |
| <b>Figure S3.</b>  | <sup>1</sup> H NMR spectra of r(G <sub>2</sub> C <sub>4</sub> ) <sub>4</sub> in 10% <sup>2</sup> H <sub>2</sub> O recorded at 5, 25 and 37 °C.                                                                                             | S3  |
| <b>Figure S4.</b>  | UV melting experiment of homodimer adopted by r(G <sub>2</sub> C <sub>4</sub> ) <sub>4</sub> .                                                                                                                                             | S4  |
| <b>Figure S5.</b>  | Imino region of <sup>1</sup> H NMR spectra of r(G <sub>2</sub> C <sub>4</sub> ) <sub>4</sub> in 10% <sup>2</sup> H <sub>2</sub> O at different pH.                                                                                         | S5  |
| <b>Table S1.</b>   | Translational diffusion coefficients (D <sub>t</sub> ) of r(G <sub>2</sub> C <sub>4</sub> ) <sub>4</sub> at different pH values.                                                                                                           | S5  |
| <b>Figure S6.</b>  | Imino region of <sup>1</sup> H NMR spectra of r(G <sub>2</sub> C <sub>4</sub> ) <sub>4</sub> in 10% <sup>2</sup> H <sub>2</sub> O at different pH and in the presence of 10% w/v PEG.                                                      | S6  |
| <b>Figure S7.</b>  | CD spectra of r(G <sub>2</sub> C <sub>4</sub> ) <sub>4</sub> with pH ranging from 4.5 to 7.0.                                                                                                                                              | S6  |
| <b>Figure S8.</b>  | 20% native PAGE of r(G <sub>2</sub> C <sub>4</sub> ) <sub>4</sub> at pH 6.0 and 5 °C.                                                                                                                                                      | S7  |
| <b>Figure S9.</b>  | Imino-imino spectral region of 2D NOESY spectrum of r(G <sub>2</sub> C <sub>4</sub> ) <sub>4</sub> .                                                                                                                                       | S7  |
| <b>Figure S10.</b> | Imino regions of <sup>1</sup> H NMR spectra of r(G <sub>2</sub> C <sub>4</sub> ) <sub>4</sub> in 10% <sup>2</sup> H <sub>2</sub> O at 5, 25 and 40 °C.                                                                                     | S8  |
| <b>Figure S11.</b> | UV melting experiment of hairpin adopted by r(G <sub>2</sub> C <sub>4</sub> ) <sub>4</sub> .                                                                                                                                               | S9  |
| <b>Figure S12.</b> | <sup>1</sup> H NMR spectra of r(G <sub>4</sub> C <sub>2</sub> ) <sub>4</sub> in 10% <sup>2</sup> H <sub>2</sub> O at 0, 7, 15, 20, 25 and 37 °C.                                                                                           | S10 |
| <b>Figure S13.</b> | Imino regions of <sup>1</sup> H NMR spectra of r(G <sub>4</sub> C <sub>2</sub> ) <sub>4</sub> in 10% <sup>2</sup> H <sub>2</sub> O at 0 and 25 °C.                                                                                         | S10 |
| <b>Figure S14.</b> | Imino and aromatic region of <sup>1</sup> H NMR spectra of r(G <sub>4</sub> C <sub>2</sub> ) <sub>4</sub> in 10% <sup>2</sup> H <sub>2</sub> O at different pH.                                                                            | S11 |
| <b>Figure S15.</b> | Imino regions of <sup>1</sup> H NMR spectra of r(G <sub>4</sub> C <sub>2</sub> ) <sub>4</sub> in 10% <sup>2</sup> H <sub>2</sub> O at concentration of 0.05, 0.1, 0.2, 0.3, and 1.1 mM per strand.                                         | S12 |
| <b>Figure S16.</b> | 20% native PAGE of r(G <sub>4</sub> C <sub>2</sub> ) <sub>4</sub> at pH 6.0 and 5 °C.                                                                                                                                                      | S12 |
| <b>Figure S17.</b> | CD spectra of equimolar mixture of r(G <sub>2</sub> C <sub>4</sub> ) <sub>4</sub> and r(G <sub>4</sub> C <sub>2</sub> ) <sub>4</sub> before (black) and after (red) annealing.                                                             | S13 |
| <b>Figure S18.</b> | <sup>1</sup> H NMR spectra of equimolar mixture of r(G <sub>2</sub> C <sub>4</sub> ) <sub>4</sub> and r(G <sub>2</sub> C <sub>4</sub> ) <sub>4</sub> before and after annealing.                                                           | S13 |
| <b>Figure S19.</b> | 20% native PAGE of r(G <sub>4</sub> C <sub>2</sub> ) <sub>4</sub> , r(G <sub>2</sub> C <sub>4</sub> ) <sub>4</sub> and r(G <sub>4</sub> C <sub>2</sub> ) <sub>4</sub> + r(G <sub>2</sub> C <sub>4</sub> ) <sub>4</sub> at pH 6.0 and 5 °C. | S13 |

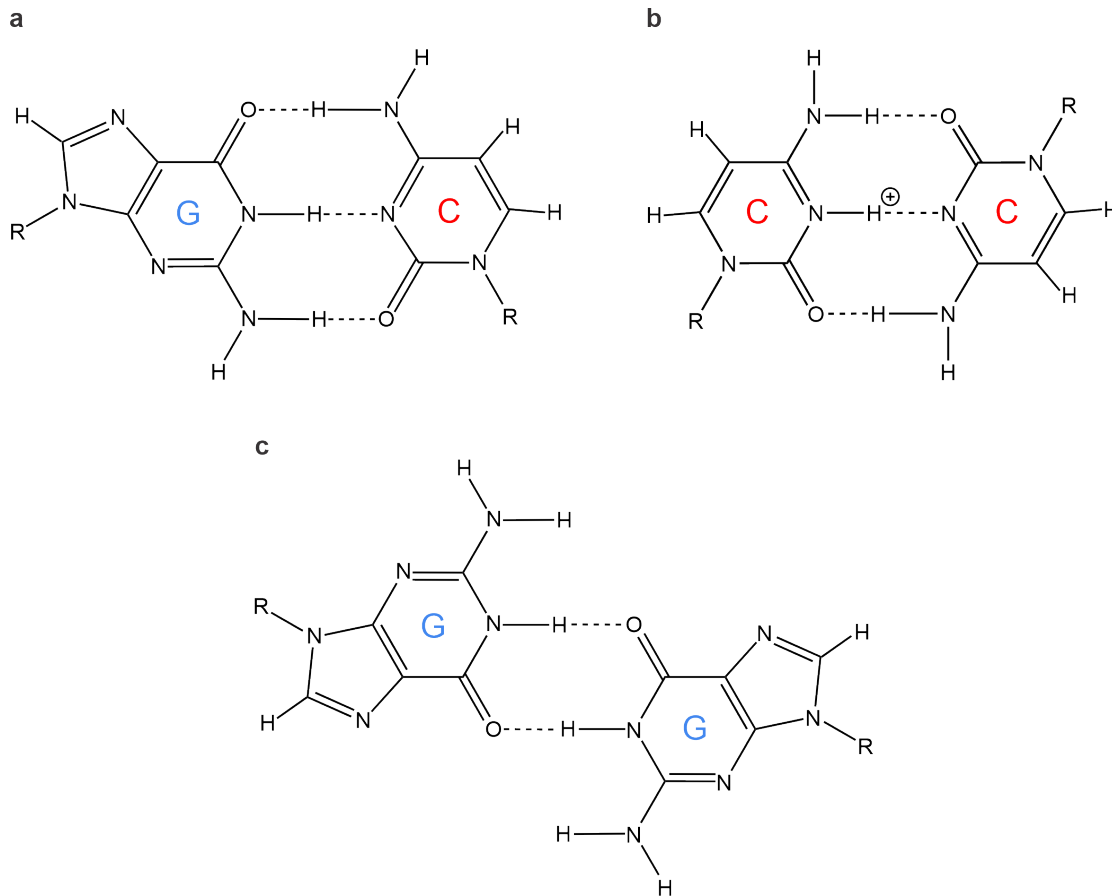

**Figure S1.** Canonical and non-canonical base pairs. Schematic presentation of **a)** Watson-Crick G-C base pair, **b)** hemi-protonated C<sup>+</sup>-C base pair and **c)** G-G base pair in N1-carbonyl symmetric geometry.

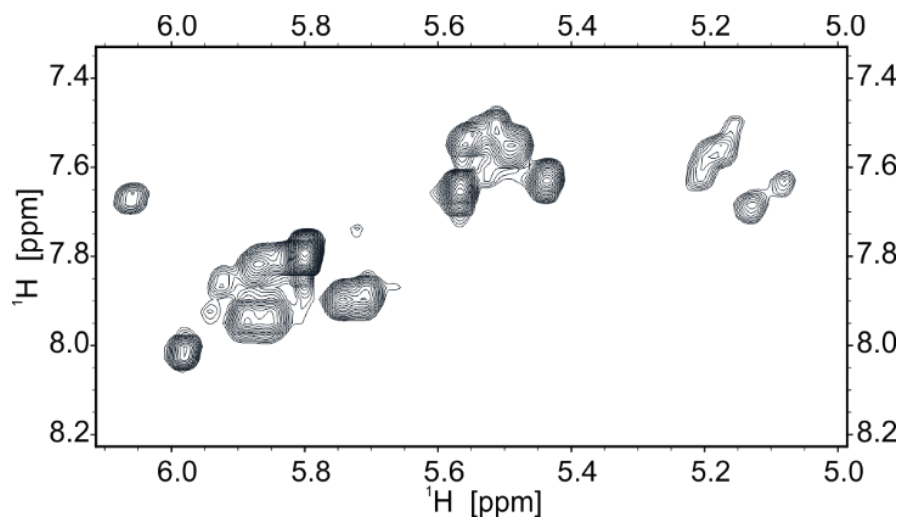

**Figure S2.** Cytosine H5/H6 correlation region of 2D TOCSY NMR spectrum of r(G<sub>2</sub>C<sub>4</sub>)<sub>4</sub>. Spectrum was recorded at pH 7.0 and 25 °C at mixing time of 80 ms and concentration of 0.9 mM per strand.

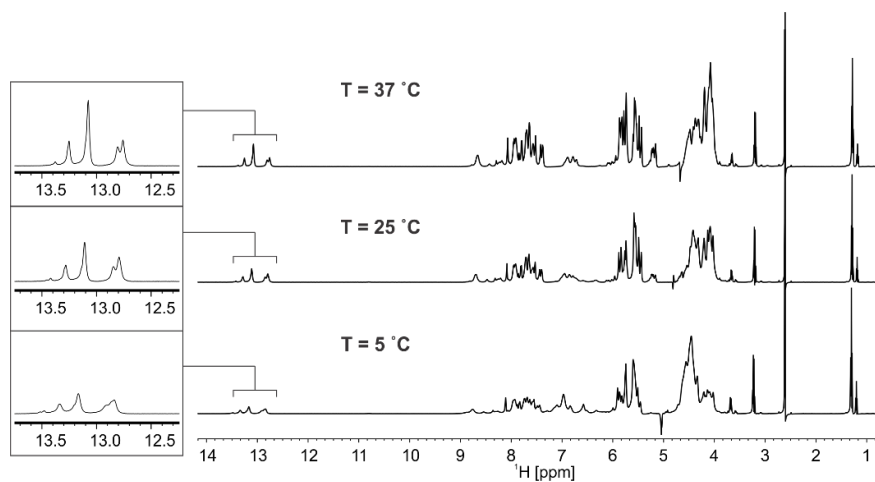

**Figure S3.** <sup>1</sup>H NMR spectra of r(G<sub>2</sub>C<sub>4</sub>)<sub>4</sub> in 10% <sup>2</sup>H<sub>2</sub>O recorded at 5, 25 and 37 °C. At 25 °C the pH was 7.0. All NMR spectra were acquired at concentration of 0.9 mM per strand.

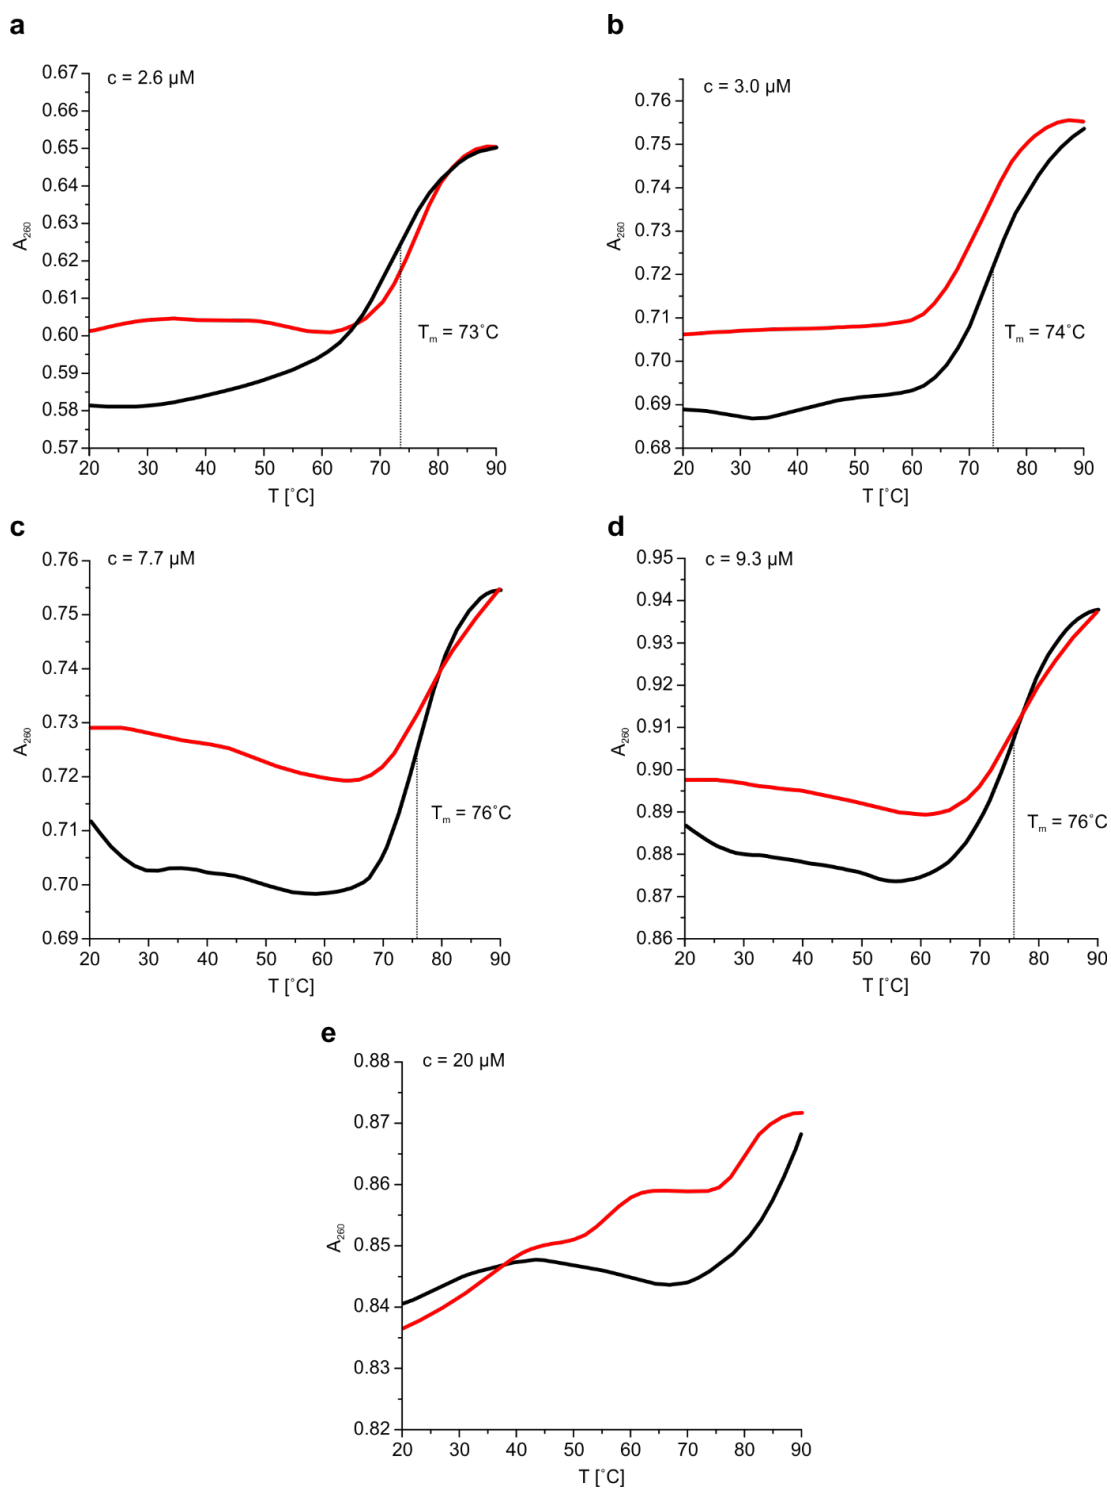

**Figure S4.** UV melting experiment of homodimer adopted by  $r(G_2C_4)_4$ . The absorbance at 260 nm was measured during one cycle of heating (black) and cooling (red) the sample in the temperature range between 20 and 90 °C. Temperature of half transition for homodimer adopted by  $r(G_2C_4)_4$  was determined for all four oligonucleotide concentrations from melting curve obtained during heating. All samples were prepared in 20 mM  $\text{Li}^+$  cacodylate buffer with pH 7.0. Concentrations of  $r(G_2C_4)_4$  were **a)** 2.6, **b)** 3.0, **c)** 7.7, **d)** 9.3 and **e)** 20  $\mu\text{M}$  per strand.

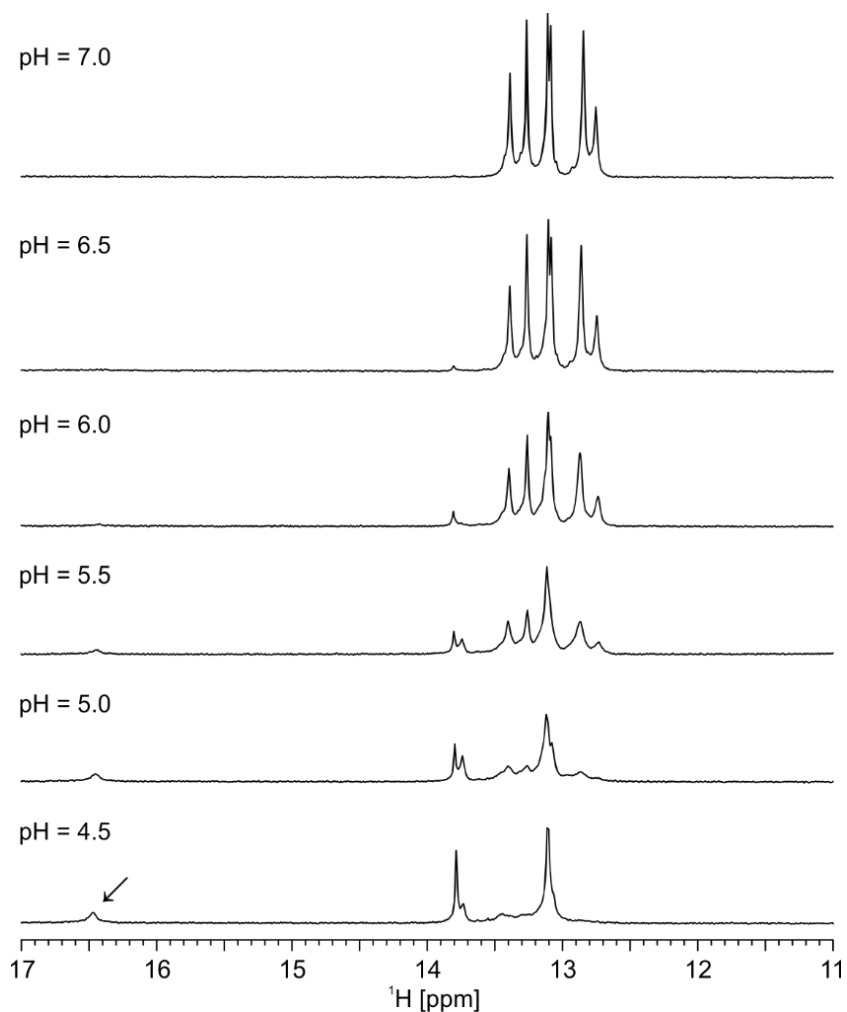

**Figure S5.** Imino region of  $^1\text{H}$  NMR spectra of  $r(\text{G}_2\text{C}_4)_4$  in 10%  $^2\text{H}_2\text{O}$  at different pH. All NMR spectra were acquired at 25 °C and 0.3 mM oligonucleotide concentration per strand. Signal corresponding to hemi-protonated  $\text{C}^+\text{-C}$  base pairs is marked with an arrow.

**Table 1.** Translational diffusion coefficients ( $D_t$ ) of  $r(\text{G}_2\text{C}_4)_4$  at different pH values. All 2D DOSY spectra were acquired at 25 °C and concentration of 0.3 mM per strand. Standard deviation of the data set was  $\pm 0.05$ .

| pH  | $D_t$ [ $\ast 10^{(-10)} \text{m}^2\text{s}^{-1}$ ] |
|-----|-----------------------------------------------------|
| 7.0 | 0.91                                                |
| 6.5 | 0.94                                                |
| 6.0 | 1.25                                                |
| 5.5 | 1.30                                                |
| 5.0 | 1.35                                                |
| 4.5 | 1.40                                                |

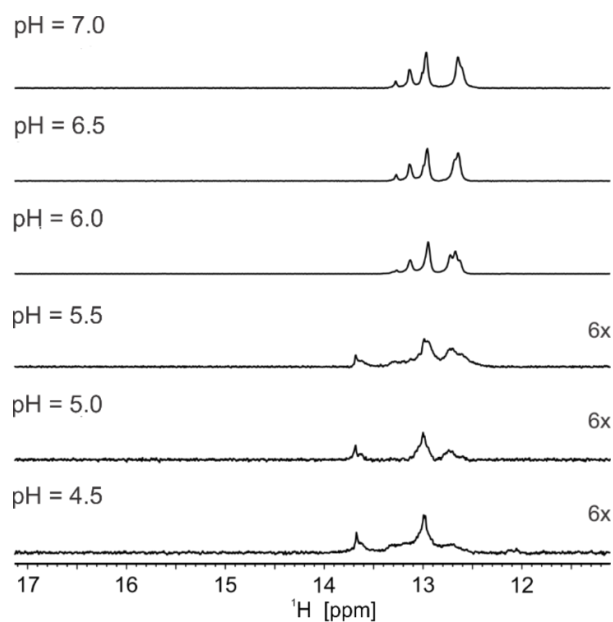

**Figure S6.** Imino region of  $^1\text{H}$  NMR spectra of  $r(\text{G}_2\text{C}_4)_4$  in 10%  $^2\text{H}_2\text{O}$  at different pH and in the presence of 10%  $w/v$  PEG. All NMR spectra were acquired at 25 °C and concentration of 0.3 mM per strand. The vertical scales of the spectra with pH ranging from 5.5 to 4.5 have been increased six-fold (6 $\times$ ).

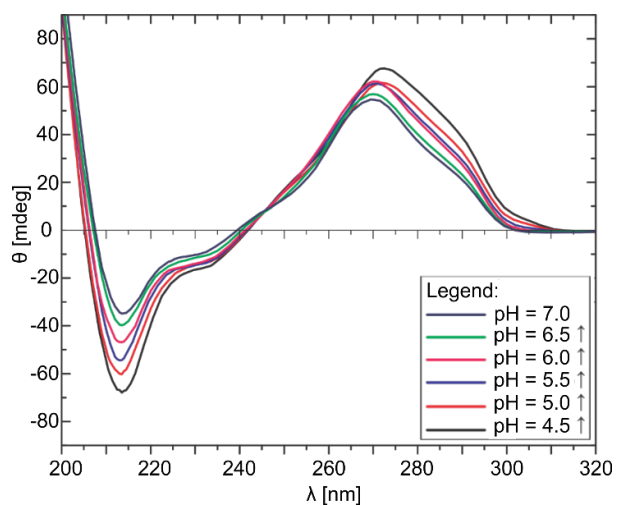

**Figure S7.** CD spectra of  $r(\text{G}_2\text{C}_4)_4$  with pH ranging from 4.5 to 7.0. Arrows represent the direction of change in pH. All CD spectra were acquired at 25 °C and concentration of 100  $\mu\text{M}$  per strand.

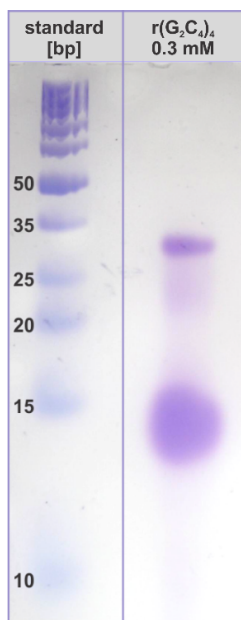

**Figure S8.** 20% native PAGE of  $r(\text{G}_2\text{C}_4)_4$  at pH 6.0 and 5 °C. Concentration of  $r(\text{G}_2\text{C}_4)_4$  was 0.3 mM per strand. DNA ladder was used as a standard.

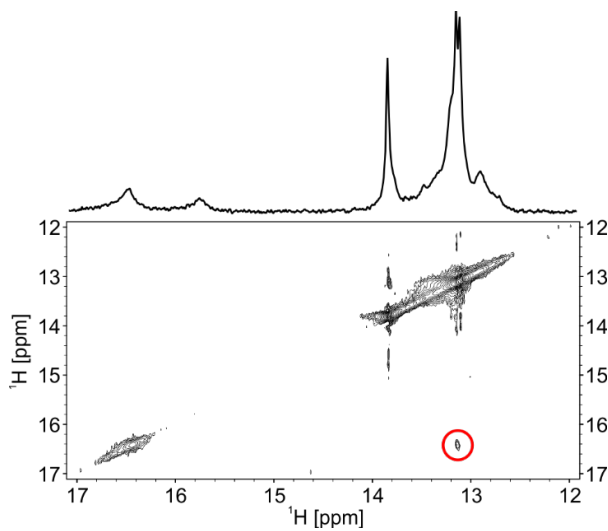

**Figure S9.** Imino-imino spectral region of 2D NOESY spectrum of  $r(\text{G}_2\text{C}_4)_4$ . Spectrum was recorded at pH 4.5 and 5 °C at mixing time of 100 ms and concentration of 0.7 mM per strand. Above 2D NOESY spectrum is 1D  $^1\text{H}$  NMR spectrum of  $r(\text{G}_2\text{C}_4)_4$  recorded at pH 4.5, 5 °C and oligonucleotide concentration of 0.7 mM per strand. NOE contact (marked with red circle) confirms the presence of hemi-protonated  $\text{C}^+\text{-C}$  base pairs within the hairpin.



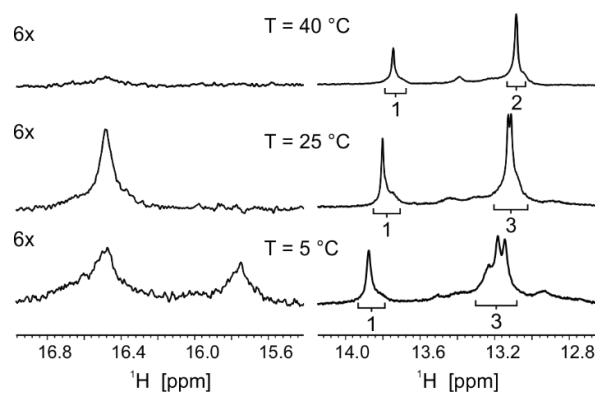

**Figure S10.** Imino regions of  $^1\text{H}$  NMR spectra of  $r(\text{G}_2\text{C}_4)_4$  in 10%  $^2\text{H}_2\text{O}$  at 5, 25 and 40  $^\circ\text{C}$ . All NMR spectra were acquired at concentration of 0.3 mM per strand. The pH was 4.5 at 25  $^\circ\text{C}$ . Numbers under signals represent integral values. The vertical scales of the spectral regions between  $\delta$  15.6 to 16.8 ppm have been increased six-fold (6 $\times$ ).

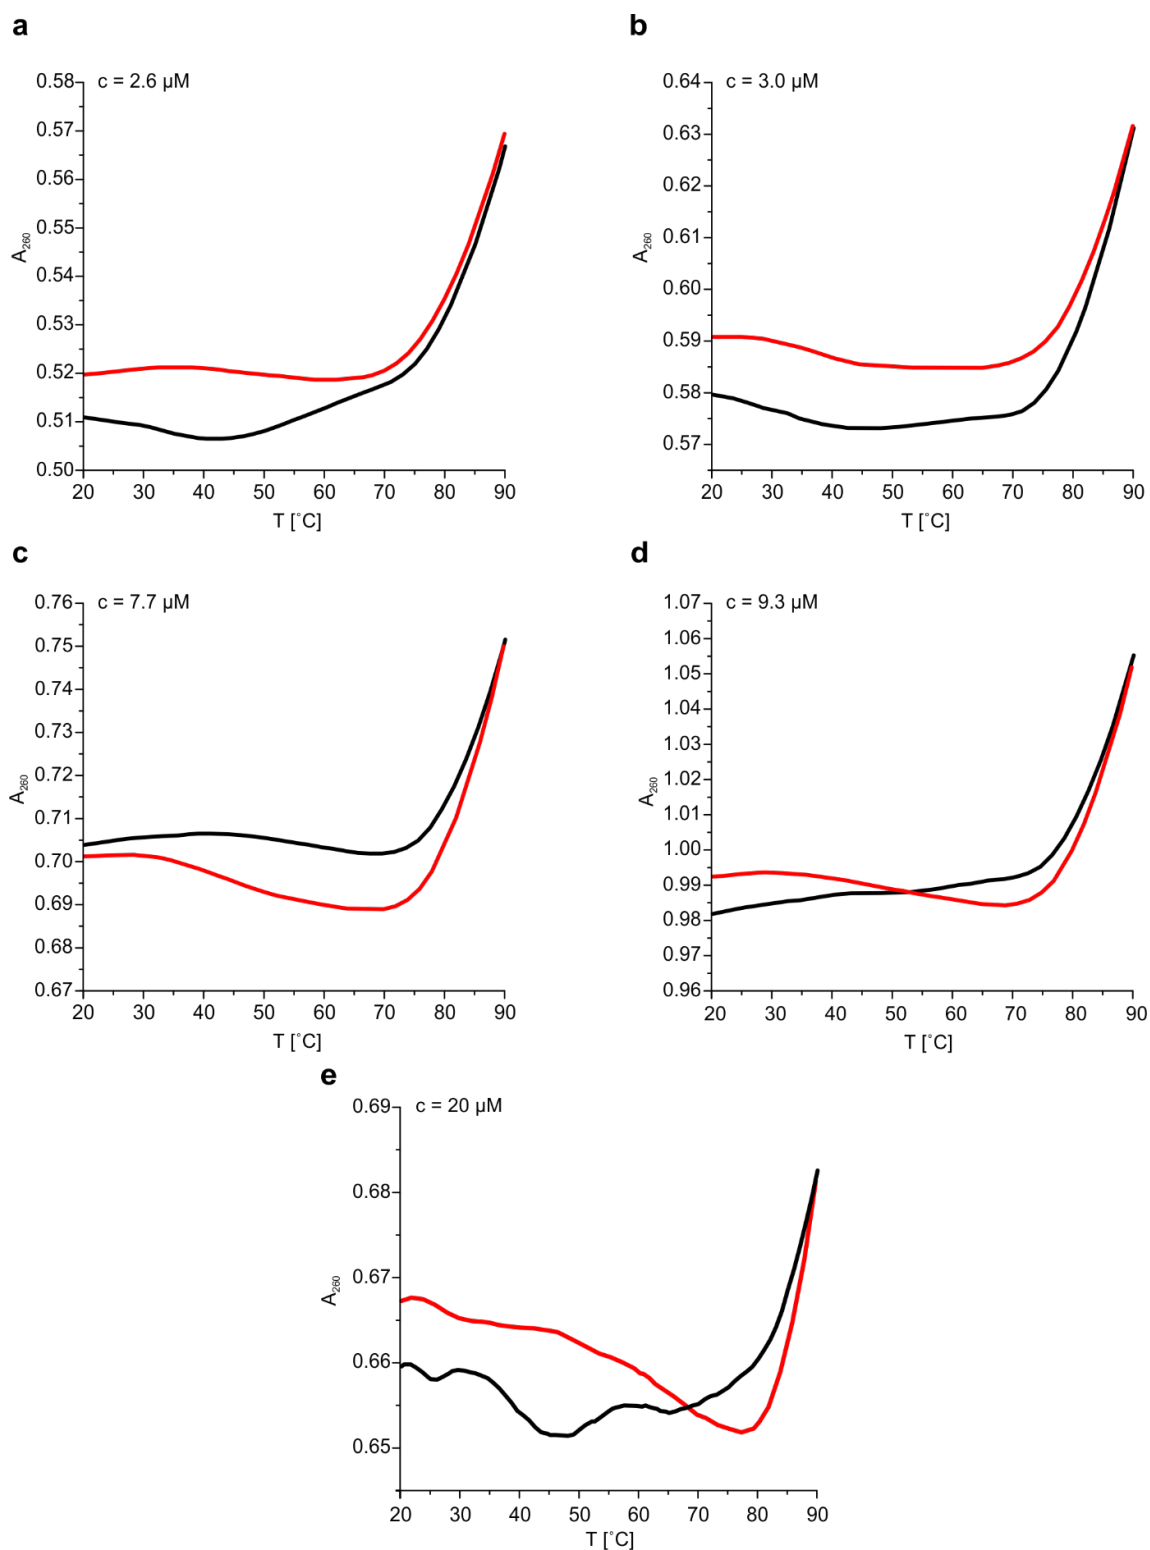

**Figure S11.** UV melting experiment of hairpin adopted by  $r(G_2C_4)_4$ . The absorbance at 260 nm was measured during one cycle of heating (black) and cooling (red) the sample in the temperature range between 20 and 90 °C. All samples were prepared in 20 mM  $\text{Li}^+$  cacodylate buffer with pH 5.0. Concentrations of  $r(G_2C_4)_4$  were a) 2.6, b) 3.0, c) 7.7, d) 9.3 and e) 20  $\mu\text{M}$  per strand.

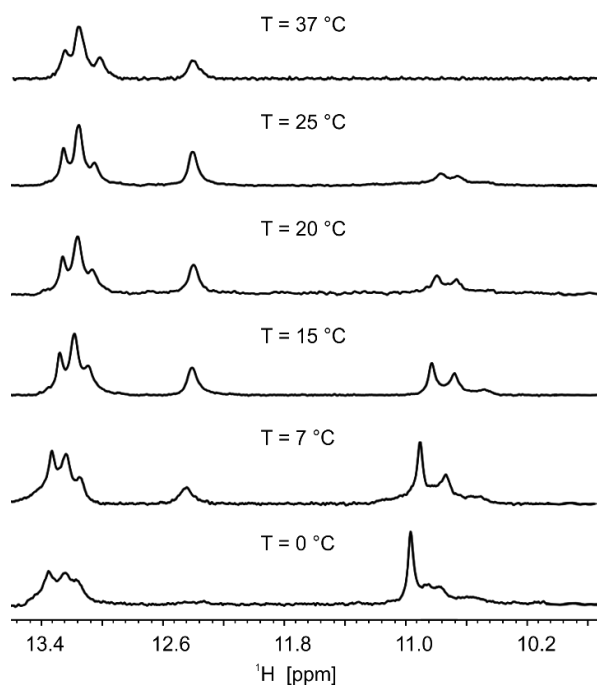

**Figure S12.**  $^1\text{H}$  NMR spectra of  $r(\text{G}_4\text{C}_2)_4$  in 10%  $^2\text{H}_2\text{O}$  at 0, 7, 15, 20, 25 and 37 °C. All NMR spectra were acquired at concentration of 0.3 mM per strand. The pH was 6.0 at 25 °C.

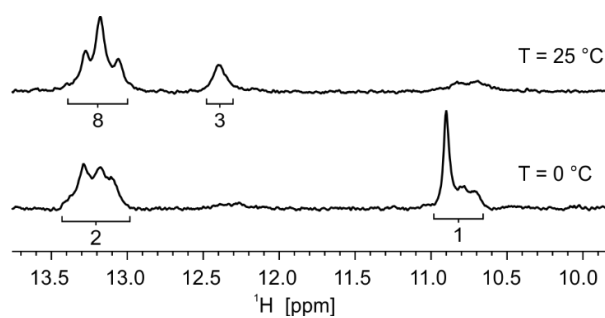

**Figure S13.** Imino regions of  $^1\text{H}$  NMR spectra of  $r(\text{G}_4\text{C}_2)_4$  in 10%  $^2\text{H}_2\text{O}$  at 0 and 25 °C. Both NMR spectra were acquired at pH 6.0 and concentration of 0.3 mM per strand. Numbers under signals represent integral values.

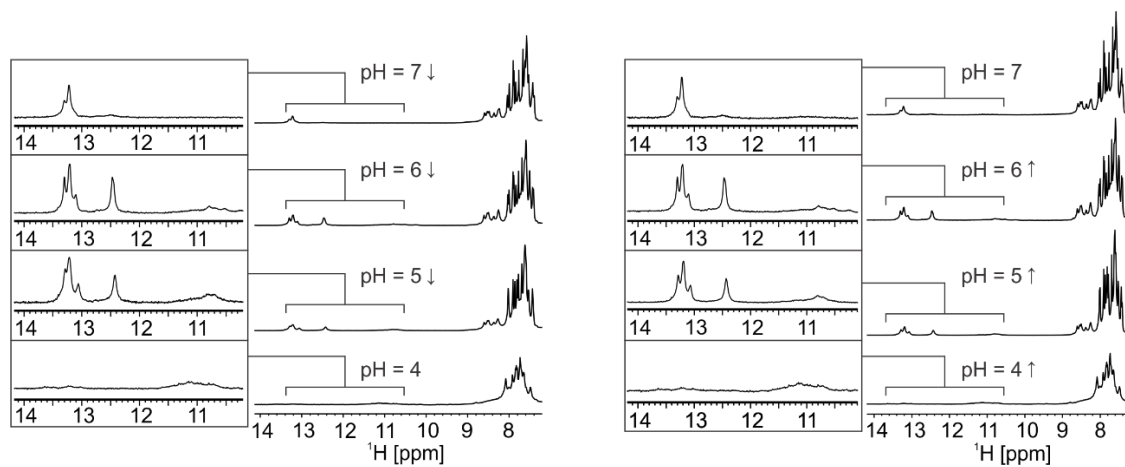

**Figure S14.** Imino and aromatic region of  $^1\text{H}$  NMR spectra of  $r(\text{G}_4\text{C}_2)_4$  in 10%  $^2\text{H}_2\text{O}$  at different pH. Arrows represent the direction of change in pH. All NMR spectra were acquired on 800 MHz spectrometer at 25 °C and concentration of 0.3 mM per strand.

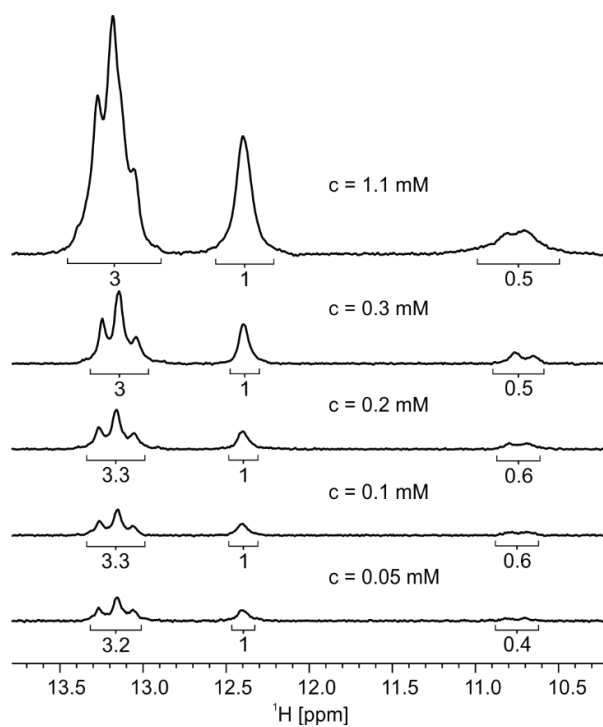

**Figure S15.** Imino regions of  $^1\text{H}$  NMR spectra of  $r(\text{G}_4\text{C}_2)_4$  in 10%  $^2\text{H}_2\text{O}$  at concentration of 0.05, 0.1, 0.2, 0.3, and 1.1 mM per strand. All NMR spectra were acquired at pH 6.0 and 25 °C. Numbers under signals represent integral values.

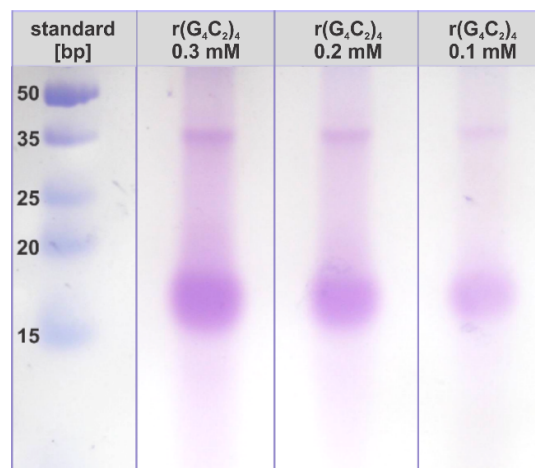

**Figure S16.** 20% native PAGE of  $r(\text{G}_4\text{C}_2)_4$  at pH 6.0 and 5 °C. Concentration of  $r(\text{G}_4\text{C}_2)_4$  was 0.3, 0.2 and 0.1 mM per strand. DNA ladder was used as a standard.

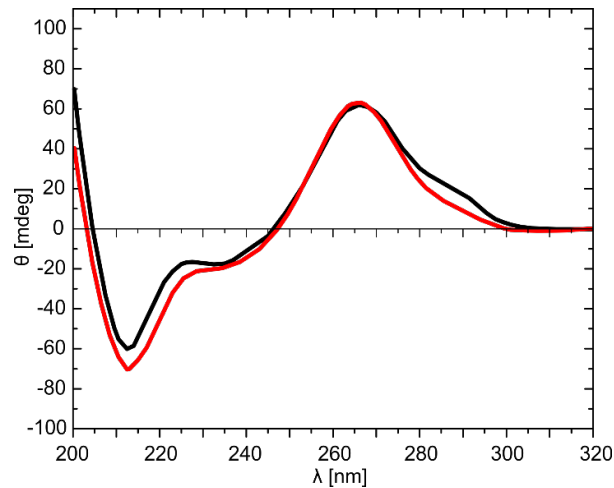

**Figure S17.** CD spectra of equimolar mixture of  $r(G_2C_4)_4$  and  $r(G_4C_2)_4$  before (black) and after (red) annealing. Both CD spectra were acquired at pH 6.0, 25 °C and concentration of 100  $\mu$ M per sense and antisense strand.

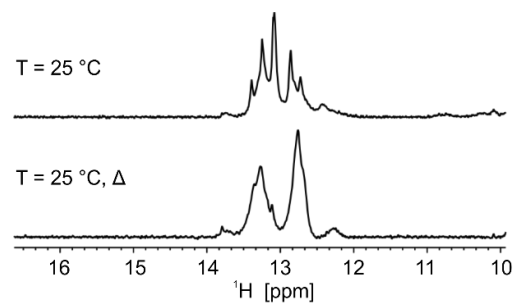

**Figure S18.**  $^1H$  NMR spectra of equimolar mixture of  $r(G_2C_4)_4$  and  $r(G_4C_2)_4$  before and after annealing.  $\Delta$  represents NMR spectrum after annealing. Both NMR spectra were acquired at 25 °C, pH 6.0 and concentration of 0.2 mM per sense and antisense strand.

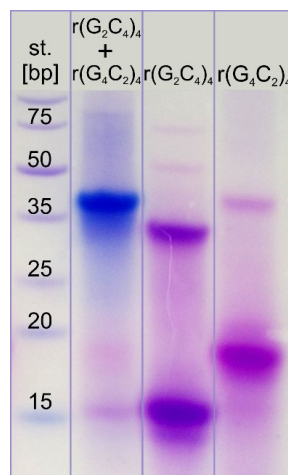

**Figure S19.** 20% native PAGE of  $r(G_4C_2)_4$ ,  $r(G_2C_4)_4$  and  $r(G_4C_2)_4 + r(G_2C_4)_4$  at pH 6.0 and 5 °C. In all samples concentration of  $r(G_4C_2)_4$  and  $r(G_2C_4)_4$  was 0.1 mM per strand. DNA ladder was used as a standard.
